# Supplementary material for: From Orphan Phage to a Proposed New Family–The Diversity of N4-Like Viruses
Source: MDPI journal article supplement (doi:10.3390/antibiotics9100663), 2020-09-30

Tree scale: 0.1

## ICTV families of podoviruses

■ "Schitoviridae"

■ Podoviridae

 Autographiviridae

## ICTV subfamilies of podoviruses

■ "Migulavirinae"

■ "Rothmandenesvirinae"

■ "Enquartavirinae"

■ "Erskinevirinae"

■ "Rhodovirinae"

■ "Fuhrmanvirinae"

■ "Pontosvirinae"

■ "Humphriesvirinae"

■ Beijerinckvirinae

Colwellvirinae

■ Corkvirinae

 Slopekvirinae

 Studiervirinae

 Molineuxvirinae

 Melnykvirinae

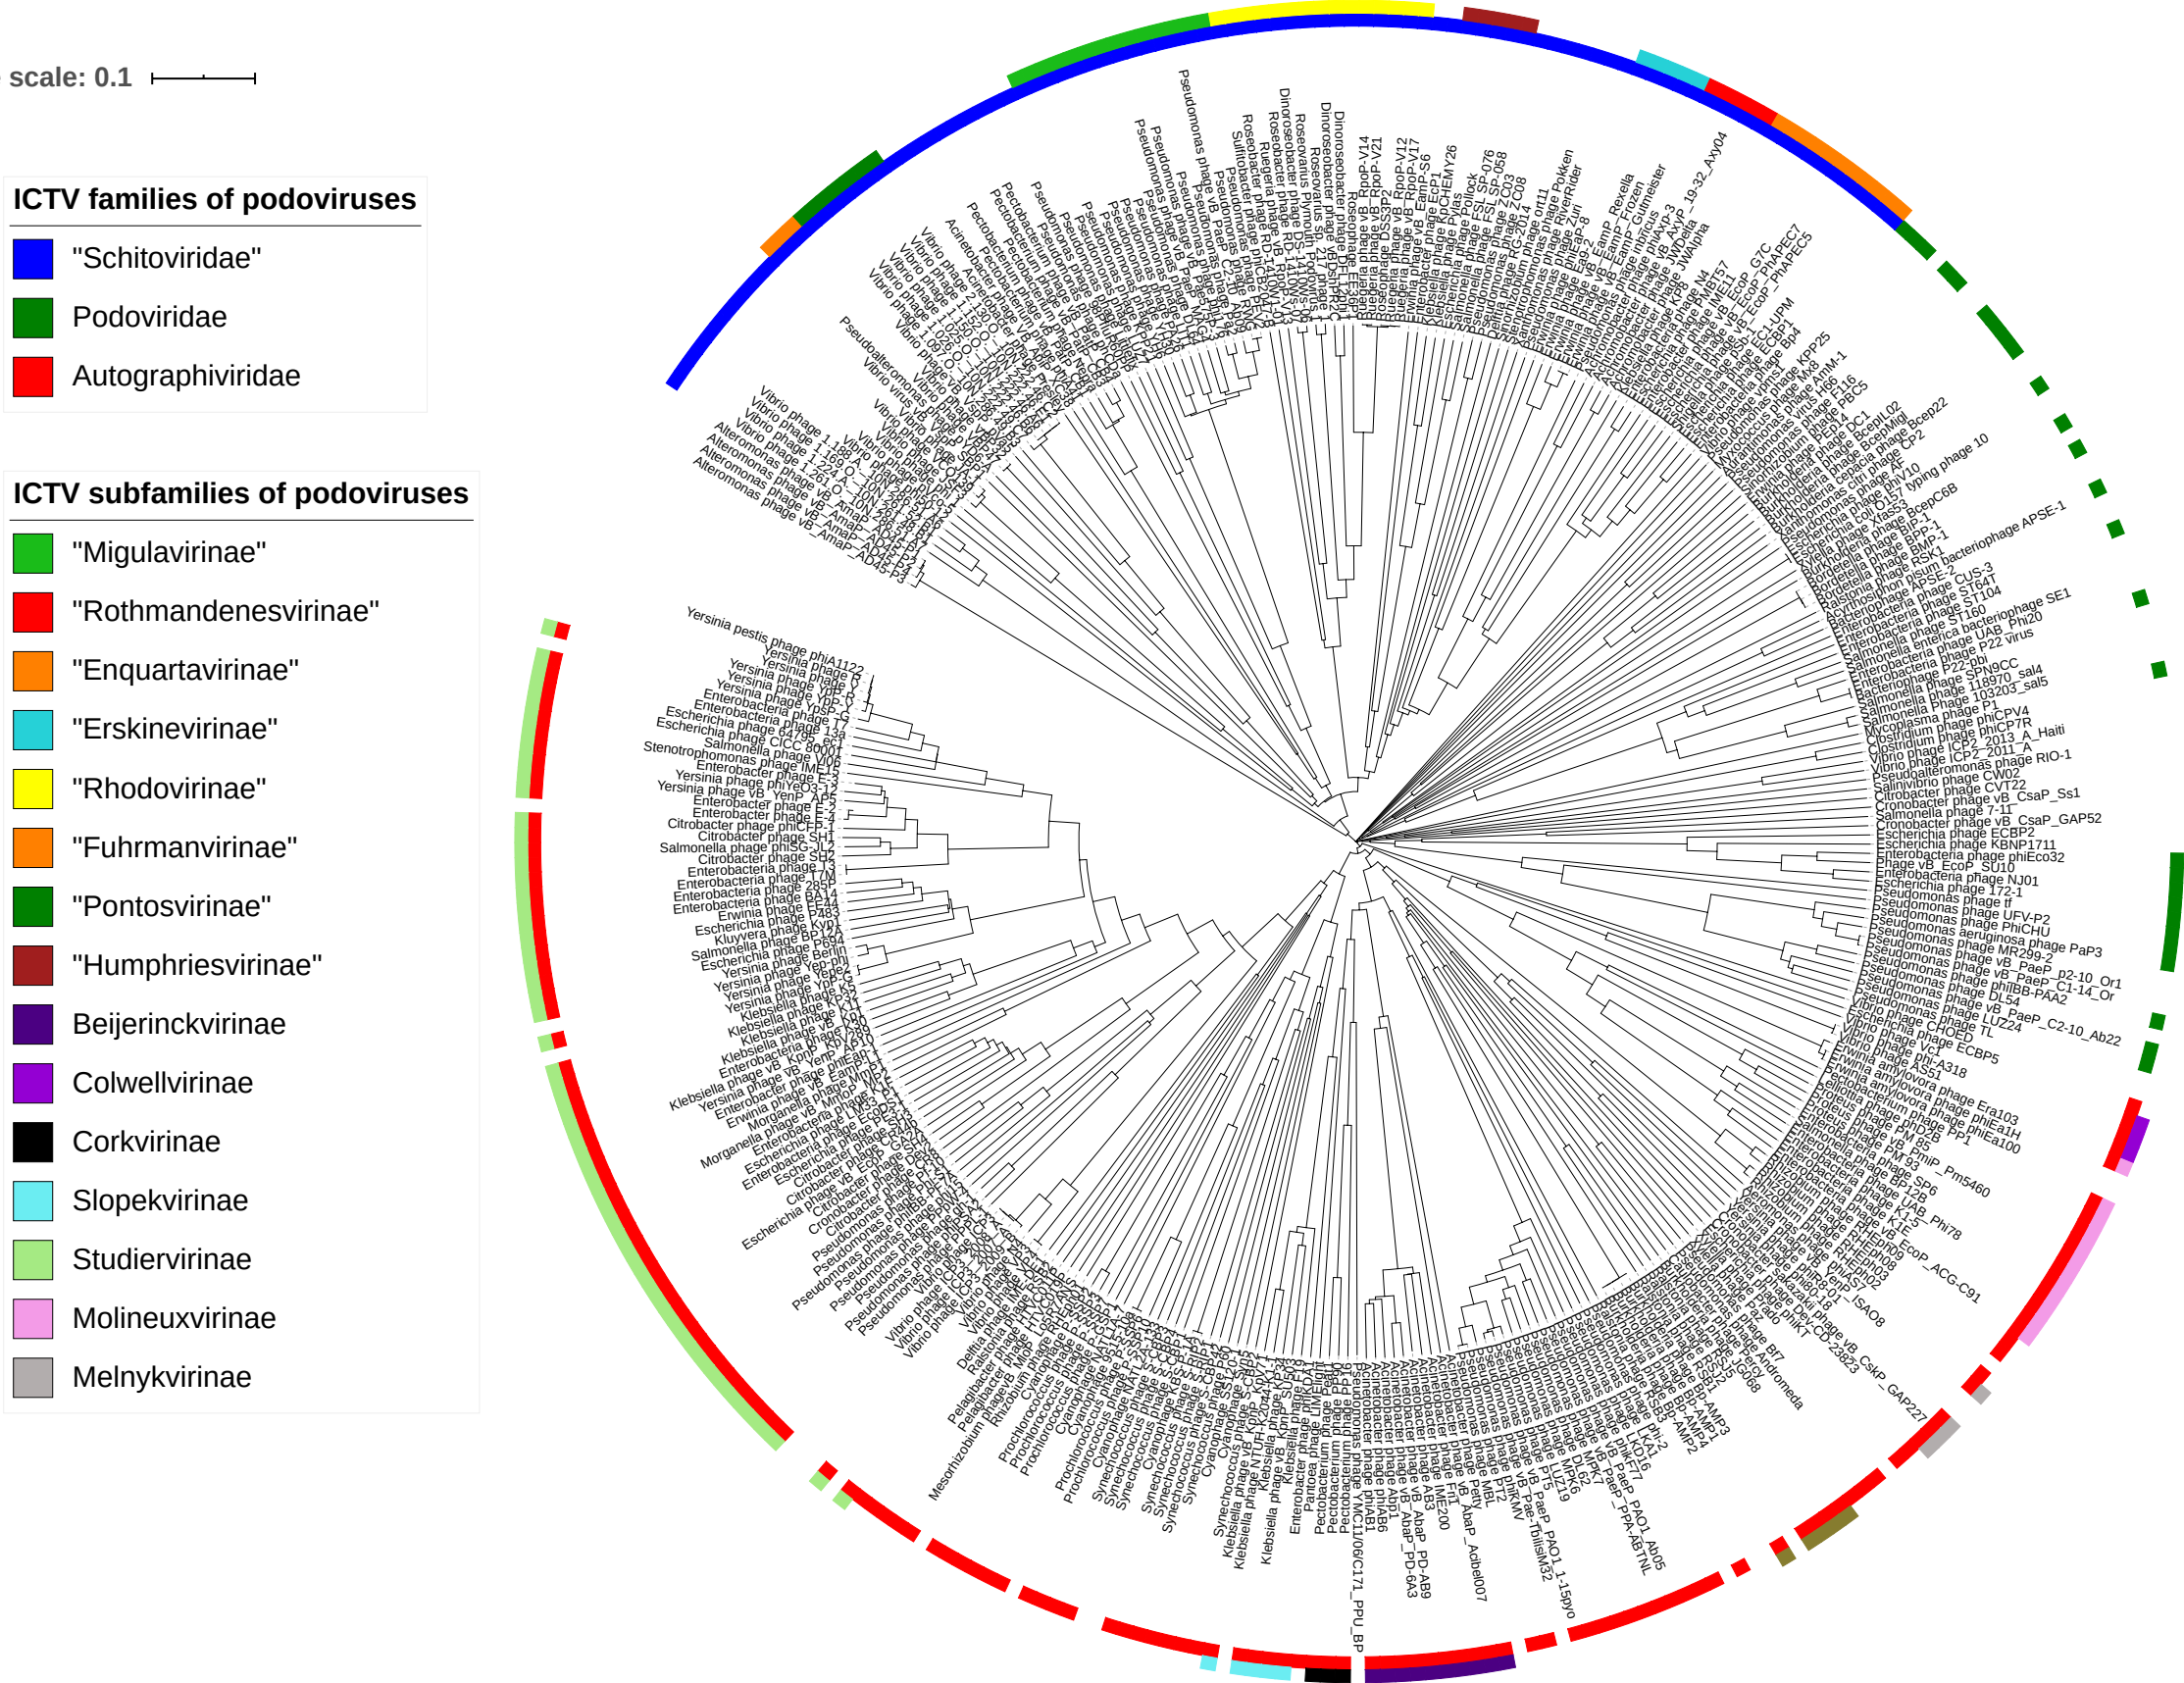

Supplement: s1 [file s1]
